# Supplementary material for: Method for the use of polymer beads as dosimeters for low-energy electron irradiation
Source: Frontiers journal article supplement (doi:10.3389/fphy.2024.1490048), 2024-12-23
Supplement: Data_Sheet_1.pdf [file Data_Sheet_1.pdf]

## Supplementary Material

### 1 SUPPLEMENTARY FIGURES

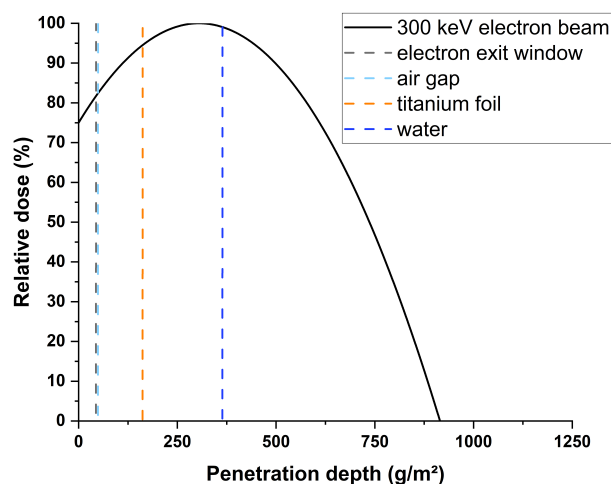

**Figure S1.** Relative dose depth curve within the irradiation set up: The maximum is reached within the liquid (after exiting the titanium foil); the dose gradient is approximately 9 % within water (room temperature)

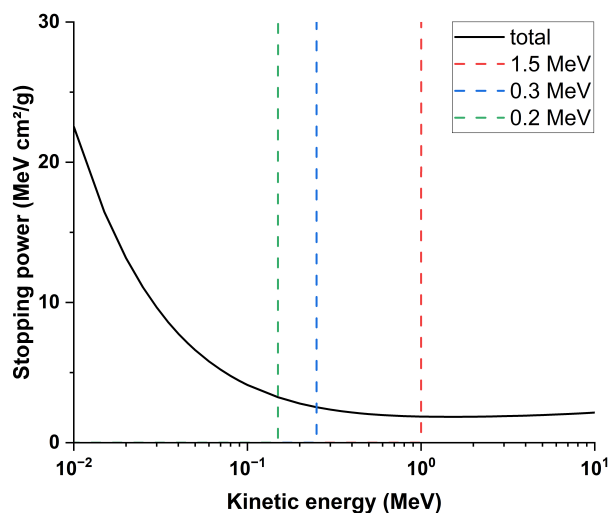

**Figure S2.** Total stopping power calculated by ESTAR in MeV cm<sup>2</sup>/g over an energy range from 10 keV to 100 MeV. Stopping power of 1.5 MeV (red dashed line) marked at 1.84 MeV cm<sup>2</sup>/g, of 0.3 MeV at 2.36 MeV cm<sup>2</sup>/g (blue dashed line) and 0.2 MeV at 2.80 MeV cm<sup>2</sup>/g (green dashed line)

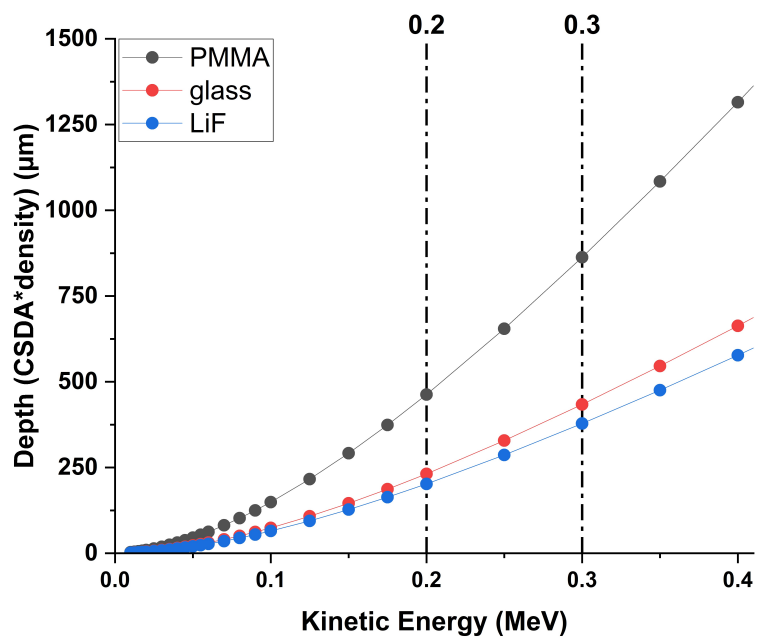

**Figure S3.** Penetration depth of 0.2 MeV and 0.3 MeV in three different materials: polymethylmethacrylate, glass and lithium fluoride. Depth estimated from CSDA range (acquired by ESTAR)
